# Supplementary material
Source: PubMed Central journal article supplement (PMC1559749)

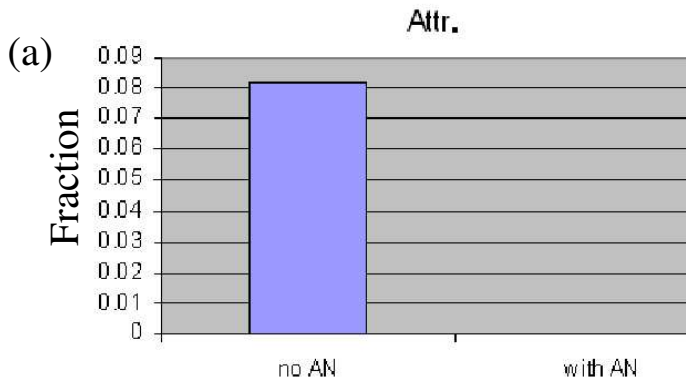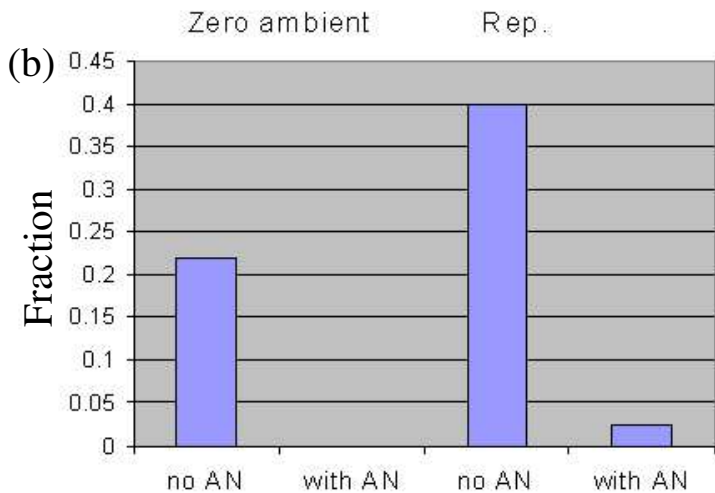

Supplement: pnas_0603101103_1.pdf [file pnas_0603101103_1.pdf]

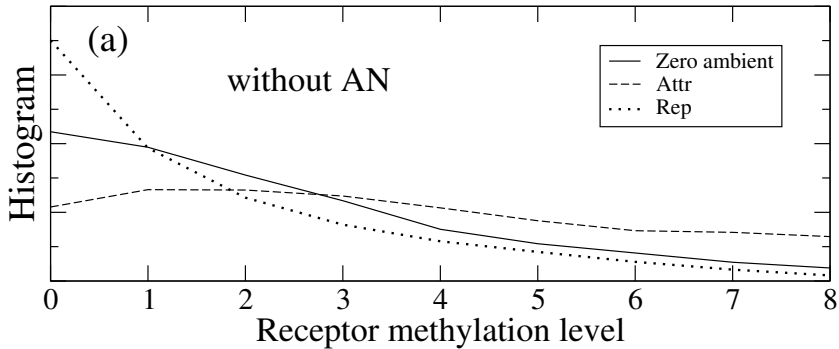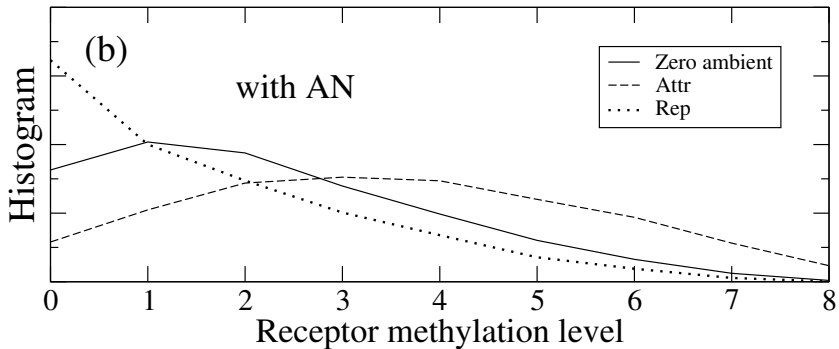

Supplement: pnas_0603101103_2.pdf [file pnas_0603101103_2.pdf]

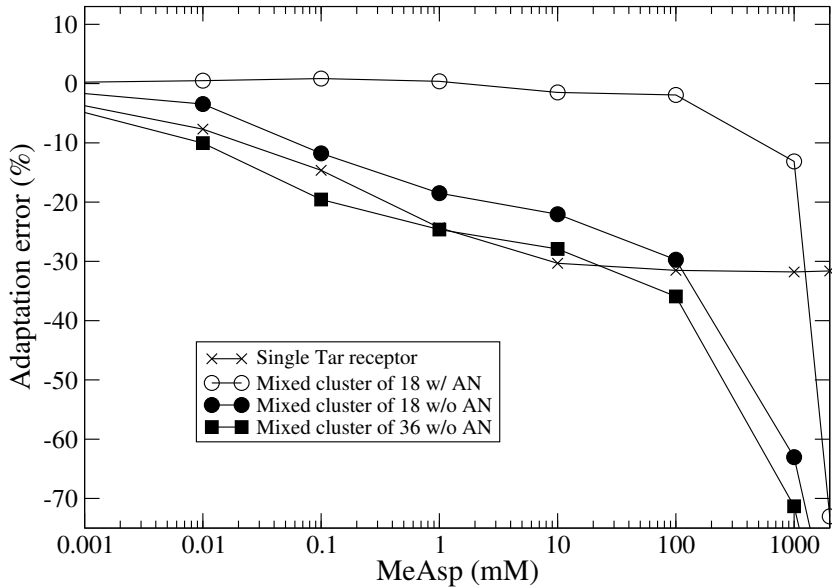

Supplement: pnas_0603101103_3.pdf [file pnas_0603101103_3.pdf]

0 mM    0.01 mM    0.1 mM    1 mM    10 mM    100 mM

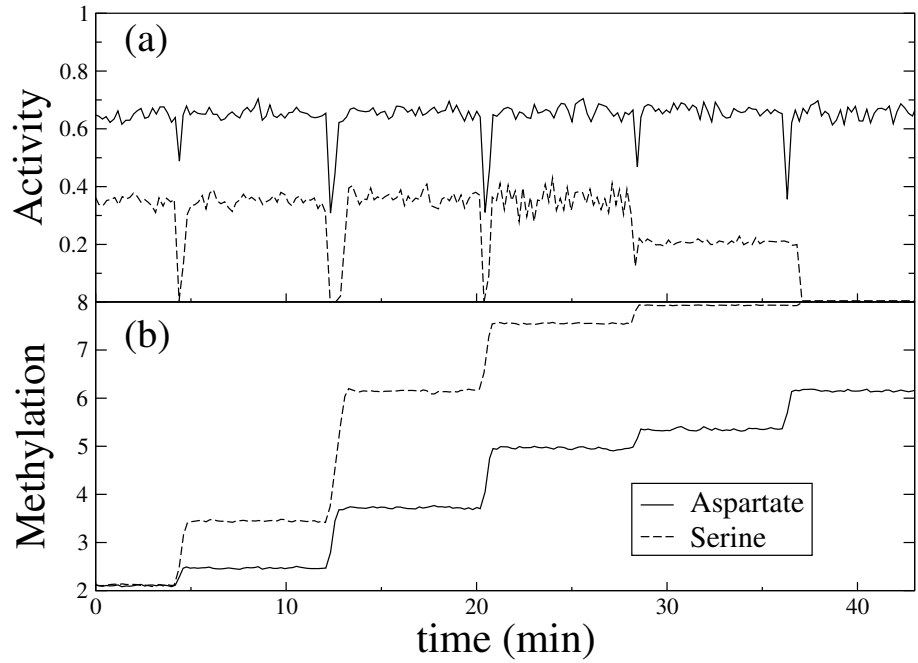

Supplement: pnas_0603101103_4.pdf [file pnas_0603101103_4.pdf]
